# Supplementary material for: A phylogenetic transform enhances analysis of compositional microbiota data
Source: eLife. 2017 Feb 15;6:e21887. doi: 10.7554/eLife.21887 (PMC5328592; doi:10.7554/eLife.21887)
Supplement: Figure 2—source data 1. — DOI: http://dx.doi.org/10.7554/eLife.21887.004 [file elife-21887-fig2-data1.xlsx]

## Sheet: Figure2b-data
ID	PERMANOVA_R2	PERMANOVA_R2_SE	Dataset
Euclidean	0.45893	0.0237597	CSS
Bray	0.3466	0.0148495	CSS
Jaccard_binary	0.11435	0.00516161	CSS
WUnifrac	0.44533	0.0223304	CSS
Unifrac	0.16026	0.00784339	CSS
PhILR	0.55875	0.0159752	CSS
Euclidean	0.26239	0.00601421	HMP
Bray	0.32775	0.00259267	HMP
Jaccard_binary	0.31579	0.00236298	HMP
WUnifrac	0.6882	0.00592948	HMP
Unifrac	0.39074	0.00215544	HMP
PhILR	0.51734	0.00291177	HMP
Euclidean	0.51978	0.0703423	GP
Bray	0.63884	0.0421147	GP
Jaccard_binary	0.61605	0.0405316	GP
WUnifrac	0.70798	0.0440742	GP
Unifrac	0.6287	0.0394894	GP
PhILR	0.78638	0.0263044	GP
This is a subset of the benchmark dataset provided in supplementary_file_2.xlsx. Specifically this uses ID 9 to represent PhILR (Taxa Weights: enorm.x.gm.counts; Branch Length Weights: blw.sqrt; Pseudocount: 1).

## Sheet: Figure2c-data
ID	LR	LR_VAR	LR_SEM	SVM	SVM_VAR	SVM_SEM	kNN	kNN_VAR	kNN_SEM	RF	RF_VAR	RF_SEM	Dataset
PhILR	0.7	0.002	0.0141421	0.69434	0.00108936	0.0104372	0.655	0.002	0.0141421	0.658491	0.00118904	0.0109043	CSS
RAW	0.627	0.002	0.0141421	0.489623	0.000506408	0.00711623	0.578	0.002	0.0141421	0.668868	0.002055	0.0143353	CSS
LOG	0.716981	0.00156639	0.0125156	0.723585	0.000766287	0.00875378	0.536792	0.000488608	0.00699005	0.638679	0.000641687	0.00801054	CSS
PhILR	0.76631	1e-05	0.001	0.757754	6.81011e-05	0.00260962	0.617188	6e-05	0.00244949	0.717953	0.000106427	0.00326231	HMP
RAW	0.693583	8e-05	0.00282843	0.397555	8.63972e-05	0.00293934	0.5199	2.44e-05	0.00156205	0.70848	0.000102155	0.00319616	HMP
LOG	0.768908	3.06102e-05	0.00174958	0.745684	3.72867e-05	0.00193098	0.549885	7.15269e-05	0.00267445	0.695034	8.34325e-05	0.00288847	HMP
PhILR	0.95	0.00375	0.0193649	0.9625	0.00640625	0.0253106	0.8125	0.0226562	0.0475986	0.8875	0.0201563	0.0448957	GP
RAW	0.8625	0.0170313	0.0412689	0.5	0	0	0.7375	0.0107812	0.0328348	0.875	0.00625	0.025	GP
LOG	0.95	0.006875	0.0262202	0.8	0.013125	0.0362284	0.8	0.013125	0.0362284	0.875	0.0125	0.0353553	GP
This is a subset of the benchmark dataset provided in supplementary_file_2.xlsx. Specifically this uses ID 9 to represent PhILR (Taxa Weights: enorm.x.gm.counts; Branch Length Weights: blw.sqrt; Pseudocount: 1).

## Sheet: Figure2b-tests
Bray-Curtis	Euclidean	Binnary Jaccard	Unweighted UniFrac	Weighted UniFrac	Dataset
3.47654e-25	1.25905e-06	2.01131e-75	1.69059e-64	2.89111e-08	CSS
1.2612e-63	3.89744e-67	9.38024e-69	3.52657e-42	1.50709e-43	HMP
7.49721e-08	5.3307e-15	6.4379e-10	6.79194e-09	0.00367464	GP
FDR corrected p-values from two-sided t-tests comparing PERMANOVA R2 of Euclidean distance in PhILR transformed space against each of the above distance/dissimilarity measures.

## Sheet: Figure2c-tests
Log vs. Raw	PhILR vs. Log	PhILR vs. Raw	Dataset	Algorithm
0.000545273	0.45858	0.00418422	CSS	LR
9.82225e-14	0.0289768	3.48156e-13	HMP	LR
0.131493	1	0.111655	GP	LR
3.42832e-12	0.0781231	9.72593e-11	CSS	SVM
5.25554e-22	0.00418422	8.00416e-22	HMP	SVM
1.08622e-06	0.00411192	1.69588e-11	GP	SVM
0.0323847	3.86015e-06	0.00318448	CSS	kNN
9.93466e-08	1.42304e-11	2.38117e-15	HMP	kNN
0.275294	0.879255	0.273877	GP	kNN
0.122126	0.216609	0.665158	CSS	RF
0.00142834	9.5551e-06	0.0866509	HMP	RF
1	0.879255	0.879255	GP	RF
FDR corrected p-values from two-sided t-tests comparing accuracy of different supervised classification algorithms on either PhILR transformed, Log transformed, or Raw relative abundance data.
