# Supplementary material for: A phylogenetic transform enhances analysis of compositional microbiota data
Source: eLife. 2017 Feb 15;6:e21887. doi: 10.7554/eLife.21887 (PMC5328592; doi:10.7554/eLife.21887)
Supplement: Figure 4—source data 1. — DOI: http://dx.doi.org/10.7554/eLife.21887.011 [file elife-21887-fig4-data1.xlsx]

## Sheet: Figure4-tests
Anterior nares	0
Keratinized gingiva	0
Buccal mucosa	0
Hard palate	0
Antecubital fossa	0
Retroauricular crease	0
Mid vagina	0
Palantine tonsils	0
Posterior fornix	0.0001
Saliva	0
Stool	0
Subgingival plaque	0
Supragingival plaque	0
Throat	0
Tongue dorsum	0
Vaginal introitus	0
FDR corrected p-values from permutation test used to assess significance of relationship between balance variance and phylogenetic depth.
