# Supplementary material for: A phylogenetic transform enhances analysis of compositional microbiota data
Source: eLife. 2017 Feb 15;6:e21887. doi: 10.7554/eLife.21887 (PMC5328592; doi:10.7554/eLife.21887)
Supplement: Supplementary file 1. — This file also contains summary information for the benchmark datasets after preprocessing. DOI: http://dx.doi.org/10.7554/eLife.21887.016 [file elife-21887-supp1.xlsx]

## Sheet: LEGEND
Benchmarking was performed for combinations of different Taxa Weights, Branch Length Weights, and pseudocounts (Methods). Taxa weights were either identical for all parts (uniform), given by the geometric mean of the counts (gm), given by the Euclidean norm of the parts times the geometric mean of the counts (enorm.x.gm), or given by the Aitchison norm of the part times the geometric mean of the …

## Sheet: Parameters and Benchmark Summar
PARAMETERS
ID	Taxa Weights	Brench Length Weights	Pseudocount
1	uniform	uniform	1
2	gm.counts	uniform	1
3	enorm.x.gm.counts	uniform	1
4	uniform	blw	1
5	gm.counts	blw	1
6	enorm.x.gm.counts	blw	1
7	uniform	blw.sqrt	1
8	gm.counts	blw.sqrt	1
9	enorm.x.gm.counts	blw.sqrt	1
10	enorm.x.gm.counts	blw.sqrt	2
11	enorm.x.gm.counts	blw.sqrt	3
12	enorm.x.gm.counts	blw.sqrt	10
13	anorm.x.gm.counts	blw.sqrt	1
BENCHMARK SUMMARY
	No. Samples	Classification Tasks (No. Classes)	Distance Task (No. Classes)	No. OTUs	Sparsity
CSS	357	Skin Sites (12)	Skin Sites (12)	1226	0.916
HMP	4358	Body Sites (16)	Body Sites (16)	3913	0.886
GP	26	Human / Non-Human (2)	Sample Source (9)	1201	0.42
Description of benchmark datasets after preprocessing. Sparsity is calculated as the percent of cells in OTU tables with zero counts.

## Sheet: CSS Machine Learning
ID	LR	LR_VAR	LR_SEM	SVM	SVM_VAR	SVM_SEM	kNN	kNN_VAR	kNN_SEM	RF	RF_VAR	RF_SEM
1	0.697	0.002	0.0141421	0.737736	0.00156283	0.0125013	0.535	0.001	0.01	0.653774	0.000944286	0.00971744
2	0.676	0.001	0.01	0.730189	0.00110716	0.0105221	0.673	0.001	0.01	0.667925	0.00115344	0.0107398
3	0.68	0.002	0.0141421	0.733962	0.000744037	0.00862576	0.654	0.0007	0.0083666	0.658491	0.00118904	0.0109043
4	0.649	0.002	0.0141421	0.623585	0.000791207	0.00889498	0.442	0.0007	0.0083666	0.649057	0.00102884	0.0101432
5	0.68	0.002	0.0141421	0.653774	0.000837487	0.00915143	0.625	0.0004	0.00632456	0.659434	0.0015388	0.0124049
6	0.695	0.002	0.0141421	0.600943	0.000908686	0.0095325	0.633	0.001	0.01	0.65	0.00111161	0.0105433
7	0.692	0.003	0.0173205	0.689623	0.002144	0.0146424	0.492	0.0006	0.00774597	0.653774	0.000944286	0.00971744
8	0.698	0.003	0.0173205	0.696226	0.00117124	0.0108224	0.648	0.0009	0.00948683	0.667925	0.00115344	0.0107398
9	0.7	0.002	0.0141421	0.69434	0.00108936	0.0104372	0.655	0.002	0.0141421	0.658491	0.00118904	0.0109043
10	0.7	0.002	0.0141421	0.688679	0.00186899	0.0136711	0.657	0.002	0.0141421	0.682075	0.000766287	0.00875378
11	0.693	0.002	0.0141421	0.687736	0.0015744	0.0125475	0.666	0.002	0.0141421	0.656604	0.00107156	0.0103516
12	0.69	0.002	0.0141421	0.666981	0.00115789	0.0107605	0.673	0.002	0.0141421	0.661321	0.001254	0.0111982
13	0.699057	0.0022864	0.0151208	0.679245	0.001157	0.0107564	0.628302	0.00151655	0.0123148	0.692453	0.00124956	0.0111783
RAW	0.627	0.002	0.0141421	0.489623	0.000506408	0.00711623	0.578	0.002	0.0141421	0.668868	0.002055	0.0143353
LOG	0.716981	0.00156639	0.0125156	0.723585	0.000766287	0.00875378	0.536792	0.000488608	0.00699005	0.638679	0.000641687	0.00801054

## Sheet: CSS Distance
ID	PERMANOVA_R2	PERMANOVA_R2_SE
Euclidean	0.45893	0.0237597
Bray	0.3466	0.0148495
Jaccard_binary	0.11435	0.00516161
WUnifrac	0.44533	0.0223304
Unifrac	0.16026	0.00784339
1	0.17436	0.00700459
2	0.50874	0.015269
3	0.45298	0.013695
4	0.16138	0.0108898
5	0.58872	0.0176082
6	0.54246	0.016636
7	0.16026	0.00868251
8	0.60968	0.0171437
9	0.55875	0.0159752
10	0.57453	0.0155168
11	0.58274	0.0152975
12	0.59504	0.0152669
13	0.68696	0.0154382

## Sheet: HMP Machine Learning
ID	LR	LR_VAR	LR_SEM	SVM	SVM_VAR	SVM_SEM	kNN	kNN_VAR	kNN_SEM	RF	RF_VAR	RF_SEM
1	0.767074	5e-05	0.00223607	0.754545	3.38551e-05	0.00183997	0.565699	6e-06	0.000774597	0.713522	8.91752e-05	0.00298622
2	0.76264	3e-05	0.00173205	0.749656	6.09344e-05	0.00246849	0.57165	2e-05	0.00141421	0.718105	0.000110418	0.00332293
3	0.764	2e-05	0.00141421	0.752865	8.89709e-05	0.0029828	0.5747	1.7e-05	0.00130384	0.716425	8.60004e-05	0.00293258
4	0.752	0.000128	0.00357771	0.740947	0.000103584	0.00321845	0.59977	5e-05	0.00223607	0.718258	0.000118449	0.00344164
5	0.75615	7e-05	0.00264575	0.747364	7.79758e-05	0.00279241	0.606	8e-05	0.00282843	0.717341	7.98375e-05	0.00282555
6	0.758976	4e-05	0.002	0.691826	4.71788e-05	0.00217207	0.614667	4e-05	0.002	0.720474	0.000231745	0.00481399
7	0.7655	9e-05	0.003	0.759969	7.25774e-05	0.00269402	0.60168	8e-05	0.00282843	0.714439	9.32371e-05	0.00305348
8	0.76409	7e-05	0.00264575	0.76081	0.000118525	0.00344274	0.615966	3e-05	0.00173205	0.717341	6.30296e-05	0.00251057
9	0.76631	1e-05	0.001	0.757754	6.81011e-05	0.00260962	0.617188	6e-05	0.00244949	0.717953	0.000106427	0.00326231
10	0.7626	0.0001	0.00316228	0.748969	5.35985e-05	0.00231513	0.614	5.705e-05	0.00238851	0.713445	0.000101717	0.00318931
11	0.7623	7e-05	0.00264575	0.741864	4.39398e-05	0.00209618	0.610389	7e-05	0.00264575	0.712529	3.74734e-05	0.00193581
12	0.7458	6e-05	0.00244949	0.721543	5.45381e-05	0.00233534	0.59159	0.0001236	0.00351568	0.714439	0.000104092	0.00322633
13	0.762567	6.47571e-05	0.00254474	0.740642	4.00646e-05	0.00200162	0.610466	0.000108603	0.0032955	0.713293	0.00013587	0.00368605
RAW	0.693583	8e-05	0.00282843	0.397555	8.63972e-05	0.00293934	0.5199	2.44e-05	0.00156205	0.70848	0.000102155	0.00319616
LOG	0.768908	3.06102e-05	0.00174958	0.745684	3.72867e-05	0.00193098	0.549885	7.15269e-05	0.00267445	0.695034	8.34325e-05	0.00288847

## Sheet: HMP Distance
ID	PERMANOVA_R2	PERMANOVA_R2_SE
Euclidean	0.26239	0.00601421
Bray	0.32775	0.00259267
Jaccard_binary	0.31579	0.00236298
WUnifrac	0.6882	0.00592948
Unifrac	0.39074	0.00215544
1	0.31562	0.00200259
2	0.39477	0.00221755
3	0.41204	0.00225924
4	0.40577	0.00339154
5	0.46678	0.00331341
6	0.50913	0.00334955
7	0.41329	0.00287972
8	0.47784	0.00278273
9	0.51734	0.00291177
10	0.51808	0.00323214
11	0.51597	0.00347253
12	0.4902	0.00434281
13	0.591753	0.00293796

## Sheet: GP Machine Learning
ID	LR	LR_VAR	LR_SEM	SVM	SVM_VAR	SVM_SEM	kNN	kNN_VAR	kNN_SEM	RF	RF_VAR	RF_SEM
1	0.95	0.00375	0.0193649	0.8625	0.0107812	0.0328348	0.7625	0.0232812	0.0482506	0.95	0.00375	0.0193649
2	0.9375	0.00390625	0.0197642	0.5	0	0	0.85	0.02125	0.0460977	0.85	0.015	0.0387298
3	0.95	0.00375	0.0193649	0.5	0	0	0.85	0.02125	0.0460977	0.8875	0.0201563	0.0448957
4	0.8875	0.00765625	0.0276699	0.8375	0.0126563	0.0355756	0.75	0.025	0.05	0.95	0.00375	0.0193649
5	0.9	0.00875	0.0295804	0.95	0.006875	0.0262202	0.8125	0.0226562	0.0475986	0.85	0.015	0.0387298
6	0.875	0.0125	0.0353553	0.85	0.015	0.0387298	0.8125	0.0226562	0.0475986	0.8875	0.0201563	0.0448957
7	0.95	0.00375	0.0193649	0.9375	0.00703125	0.0265165	0.725	0.024375	0.049371	0.95	0.00375	0.0193649
8	0.9375	0.00390625	0.0197642	0.9625	0.00640625	0.0253106	0.8125	0.0226562	0.0475986	0.85	0.015	0.0387298
9	0.95	0.00375	0.0193649	0.9625	0.00640625	0.0253106	0.8125	0.0226562	0.0475986	0.8875	0.0201563	0.0448957
10	0.9375	0.00390625	0.0197642	0.95	0.006875	0.0262202	0.8125	0.0226562	0.0475986	0.8125	0.0164063	0.0405046
11	0.9375	0.00390625	0.0197642	0.95	0.006875	0.0262202	0.8	0.0225	0.0474342	0.8125	0.0195312	0.0441942
12	0.95	0.00375	0.0193649	0.8875	0.00453125	0.0212867	0.8125	0.0226562	0.0475986	0.8875	0.00765625	0.0276699
13	0.95	0.00375	0.0193649	0.5	0	0	0.8125	0.0226562	0.0475986	0.8875	0.0139063	0.0372911
RAW	0.8625	0.0170313	0.0412689	0.5	0	0	0.7375	0.0107812	0.0328348	0.875	0.00625	0.025
LOG	0.95	0.006875	0.0262202	0.8	0.013125	0.0362284	0.8	0.013125	0.0362284	0.875	0.0125	0.0353553

## Sheet: GP Distance
ID	PERMANOVA_R2	PERMANOVA_R2_SE
Euclidean	0.51978	0.0703423
Bray	0.63884	0.0421147
Jaccard_binary	0.61605	0.0405316
WUnifrac	0.70798	0.0440742
Unifrac	0.6287	0.0394894
1	0.78001	0.0300024
2	0.81024	0.0245704
3	0.80381	0.0252509
4	0.77627	0.0281721
5	0.78011	0.0268135
6	0.76897	0.0282523
7	0.77625	0.0291189
8	0.79497	0.025386
9	0.78638	0.0263044
10	0.7881	0.0264924
11	0.78732	0.0268532
12	0.77677	0.0290855
13	0.80205	0.0247818
