# Supplementary material for: A phylogenetic transform enhances analysis of compositional microbiota data
Source: eLife. 2017 Feb 15;6:e21887. doi: 10.7554/eLife.21887 (PMC5328592; doi:10.7554/eLife.21887)
Supplement: Supplementary file 2. — DOI: http://dx.doi.org/10.7554/eLife.21887.017 [file elife-21887-supp2.xlsx]

## Sheet: SUMMARY AND LEGEND
To determine the sensitivity of the PhILR transform to preprocessing setting, the Caporaso Skin Sites (CSS) dataset was reanalyzed as in Figure 2B and 2C with 4 separate filtering strategies (CSS 1-4). For CSS 1-4 the data was PhILR transformed in the same manner as Figure 2B and 2C,
Summary of Filtering
	CSS 1	(Used in Figure 2 of manuscript) Keep taxa seen with at least than 10 counts across all samples
	CSS 2	Keep taxa that are seen with at least 3 counts in more than 1% of samples (1)
	CSS 3	Keep all taxa that represent at least 0.005% of total reads (2)
	CSS 4	Keep all taxa that are at least 0.1% abundant in any sample (3)
	1. McMurdie PJ & Holmes S (2013) phyloseq: an R package for reproducible interactive analysis and graphics of microbiome census data. PLoS One 8(4):e61217.
	2. Navas-Molina JA, et al. (2013) Advancing our understanding of the human microbiome using QIIME. Methods Enzymol 531:371-444.
	3. Gloor GB & Reid G (2016) Compositional analysis: a valid approach to analyze microbiome high-throughput sequencing data. Can J Microbiol 62(8):692-703.
Resulting Dataset Characteristics
		No. OTUs
	CSS 1	1226
	CSS 2	366
	CSS 3	774
	CSS 4	6142
Params to analyze each dataset
	Taxa Weights	enorm.x.gm	Euclidian norm of a taxon's relative abundance across samples times the geometric mean of the taxon's counts across samples (Methods).
	Branch Length Weights	blw.sqrt	The square root of the phylogenetic distance between a balances two direct descendants (Methods).
	Pseudocount	1

## Sheet: Machine Learning
Filtered Dataset	Method	LR	LR_VAR	LR_SEM	SVM	SVM_VAR	SVM_SEM	kNN	kNN_VAR	kNN_SEM	RF	RF_VAR	RF_SEM
CSS 1	LOG	0.716981	0.00156639	0.0125156	0.723585	0.000766287	0.00875378	0.536792	0.000488608	0.00699005	0.638679	0.000641687	0.00801054
CSS 2	LOG	0.699057	0.0021796	0.0147635	0.720755	0.00185475	0.0136189	0.596226	0.00154503	0.0124299	0.621698	0.000951406	0.00975401
CSS 3	LOG	0.709434	0.00266643	0.0163292	0.733019	0.00149608	0.0122315	0.561321	0.000396048	0.00629324	0.631132	0.0017524	0.0132378
CSS 4	LOG	0.70566	0.00174083	0.0131941	0.733019	0.00117569	0.0108429	0.492453	0.000530438	0.00728312	0.632075	0.00142399	0.0119331
CSS 1	PhILR	0.7	0.00202563	0.0142325	0.69434	0.00108936	0.0104372	0.654717	0.00178355	0.013355	0.658491	0.00118904	0.0109043
CSS 2	PhILR	0.7	0.00293343	0.0171273	0.689623	0.000791207	0.00889498	0.666038	0.00197935	0.0140689	0.679245	0.000694197	0.00833185
CSS 3	PhILR	0.7	0.00120684	0.0109856	0.699057	0.000809007	0.00899448	0.65566	0.00148184	0.0121731	0.687736	0.0022508	0.0150027
CSS 4	PhILR	0.708491	0.0017524	0.0132378	0.622642	0.0010858	0.0104202	0.651887	0.001699	0.0130346	0.670755	0.00104041	0.0102
CSS 1	RAW	0.627358	0.00222944	0.0149313	0.489623	0.000506408	0.00711623	0.578302	0.00219028	0.0147996	0.668868	0.002055	0.0143353
CSS 2	RAW	0.624528	0.00174083	0.0131941	0.564151	0.000637237	0.00798272	0.575472	0.00231399	0.0152118	0.672642	0.00121129	0.0110058
CSS 3	RAW	0.623585	0.0022152	0.0148836	0.521698	0.000463688	0.00680947	0.574528	0.0025712	0.016035	0.684906	0.000786757	0.00886993
CSS 4	RAW	0.636792	0.00219384	0.0148116	0.353774	4.00498e-05	0.00200125	0.593396	0.0019838	0.0140848	0.642453	0.0018236	0.0135041
CSS 3

## Sheet: Distance
Filtered Dataset	Method	PERMANOVA_R2	PERMANOVA_R2_SE
CSS 1	Bray	0.346589	0.0148495
CSS 2	Bray	0.364752	0.0155216
CSS 3	Bray	0.352014	0.0150592
CSS 4	Bray	0.333575	0.0142599
CSS 1	Euclidean	0.458932	0.0237597
CSS 2	Euclidean	0.454638	0.0234548
CSS 3	Euclidean	0.4574	0.0236168
CSS 4	Euclidean	0.462959	0.0240605
CSS 1	Jaccard_binary	0.114346	0.00516161
CSS 2	Jaccard_binary	0.14627	0.00646955
CSS 3	Jaccard_binary	0.124369	0.00548677
CSS 4	Jaccard_binary	0.0951003	0.00443592
CSS 1	PhILR	0.558746	0.0159752
CSS 2	PhILR	0.522204	0.015214
CSS 3	PhILR	0.546511	0.0156363
CSS 4	PhILR	0.504929	0.0161033
CSS 1	Unifrac	0.16026	0.00784339
CSS 2	Unifrac	0.179304	0.00867525
CSS 3	Unifrac	0.169231	0.00823972
CSS 4	Unifrac	0.144023	0.00760689
CSS 1	WUnifrac	0.445326	0.0223304
CSS 2	WUnifrac	0.454028	0.0234731
CSS 3	WUnifrac	0.448949	0.0224229
CSS 4	WUnifrac	0.429048	0.0215512
